# Supplementary material for: Spectroscopic behaviour of lanthanide(III) coordination compounds with Schiff base ligands
Source: Royal Society of Chemistry journal article supplement (doi:10.1039/b003379k), 2000-01-01
Supplement: esi_b003379k.doc [file esi_b003379k.doc]

# Supplementary Information

# Spectroscopic behaviour of lanthanide(III) coordination compounds with Schiff base ligands

Koen Binnemans(*), Rik Van Deun, Christiane Görller-Walrand, Simon R. Collinson, Françoise Martin, Duncan W. Bruce, and Claudia Wickleder

Supplementary Table I. Intensity calculations on the Ho(III) Schiff base complex [Ho(L1H)3(NO3)3]

| Transition (a) | Wave number  (cm-1) | Dexp  (10-6 Debye2) | Dcalc (b)  (10-6 Debye2) | Dexp-Dcalc | Dcalc/Dexp |
| --- | --- | --- | --- | --- | --- |
| 5I5 | 11250 | 103 | 33 | +70 | 0.32 |
| 5F5 | 15550 | 584 | 607 | -23 | 1.04 |
| 5F4,5S2 | 18550 | 783 | 730 | +53 | 0.93 |
| 5F3 | 20620 | 270 | 219 | +51 | 0.81 |
| 3K8, 5F2 | 21140 | 154 | 323 | -169 | 2.10 |
| 5G6 | 21950 | 6590 | 6587 | +3 | 1.00 |

1. All the transitions start from the 5I8 ground state.
2. The set of Judd-Ofelt intensity parameters used to calculate the dipole strength *Dcalc* is: 2 = (22.65  1.21)10-20 cm2, 4 = (3.34  2.18)10-20 cm2, 6 = (3.62  0.88)10-20 cm2. The rms value is 11510-6 Debye2.

Supplementary Table II. Intensity calculations on the Er(III) Schiff base complex [Er(L1H)3(NO3)3]

| Transition (a) | Wave number  (cm-1) | Dexp  (10-6 Debye2) | Dcalc (b)  (10-6 Debye2) | Dexp-Dcalc | Dcalc/Dexp |
| --- | --- | --- | --- | --- | --- |
| 4I11/2 | 10240 | 225 | 278 | -53 | 1.24 |
| 4I9/2 | 12560 | 21 | 43 | -22 | 2.05 |
| 4F9/2 | 15270 | 358 | 347 | +11 | 0.97 |
| 4S3/2 | 18450 | 89 | 110 | -21 | 1.24 |
| 2H11/2 | 19120 | 2324 | 2184 | +140 | 0.94 |
| 4F7/2 | 20460 | 428 | 344 | +84 | 0.80 |

1. All the transitions start from the 5I15/2 ground state.
2. The set of Judd-Ofelt intensity parameters used to calculate the dipole strength *Dcalc* is: 2 = (16.47  0.58)10-20 cm2, 4 = (1.26  0.71)10-20 cm2, 6 = (2.85  0.46)10-20 cm2. The rms value is 10110-6 Debye2.

Supplementary Figure I. Absorption spectrum of the Ho(III) complex [Ho(L1H)3(NO3)3] in chloroform (conc. 0.005 M, ambient temperature). All the transitions start from the 5I8 ground state.

Supplementary Figure II. Luminescence decay curve of the Eu(III) complex Eu(L1H)3(NO3)3 at 20 K, excited at 579 nm.
